# Supplementary material for: Models of Neocortical Layer 5b Pyramidal Cells Capturing a Wide Range of Dendritic and Perisomatic Active Properties
Source: PLoS Comput Biol. 2011 Jul 28;7(7):e1002107. doi: 10.1371/journal.pcbi.1002107 (PMC3145650; doi:10.1371/journal.pcbi.1002107)
Supplement: Table S2 — Parameter values of model with AP initiation in the axon. (DOC) [file pcbi.1002107.s008.doc]

**Table S2. Parameter values of model with AP initiation in the axon.**

| **Parameter** | **Value** | **Parameter** | **Value** |
| --- | --- | --- | --- |
| ax. Nat | 38,961 | s.m | 0.08 |
| ax.*Nap* | 58.34 | a.Nat | 107.45 |
| ax.*Kp* | 1,888.5 | a.*Kv3.1* | 9.04 |
| ax.*Kt* | 772.74 | a.*Ca_HVA* | 3.51 |
| ax.*SK* | 0.47 | a.*Ca_LVA* | 709.75 |
| ax.*Kv3.1* | 4,738 | a.*SK* | 0.01 |
| ax.*Ca_HVA* | 2.222 | a.m | 4.95 |
| ax.*Ca_LVA* | 8.13 | a.τdecay | 35.7 |
| ax.γ | 0.000525 | a.γ | 0.000637 |
| ax.τdecay | 277.3 | ax.gleak | 0.3 |
| ax.m | 133.22 | s.gleak | 0.3 |
| s. Nat | 9,989 | a.gleak | 0.3 |
| s.*Kv3.1* | 3,380 | b.gleak | 0.3 |
| s.*SK* | 996.5 | ax.gh | 1 |
| s.*Ca_HVA* | 6.44 | s.gh | 1 |
| s.*Ca_LVA* | 5.57 | a.gh | 0.5 |
| s.γ | 0.000509 | b.gh | 0.5 |
| s.τdecay | 294.7 |  |  |

s – soma, a – apical, b – basal, ax – axon. Conductance is in pS/µm2, τdecay is in ms. Values of apical Ca2+ channels are given for the high density distal zone.
